# Supplementary material
Source: publisher figshare collection journal article supplement (https://acs.figshare.com/ndownloader/files/4206688)

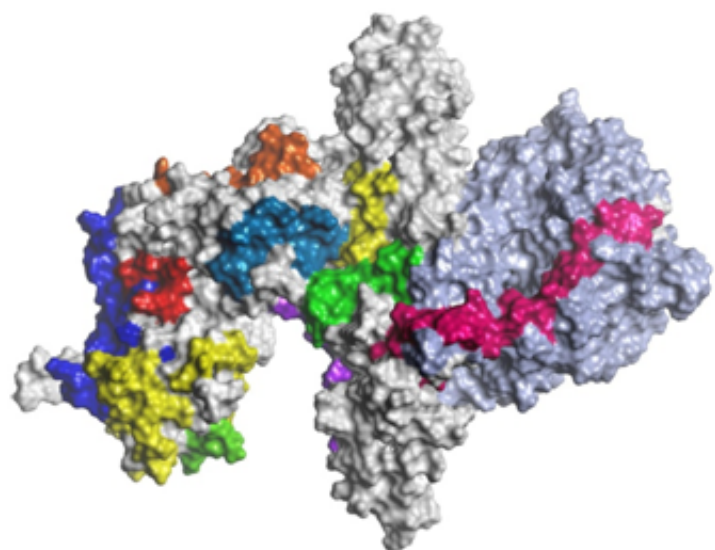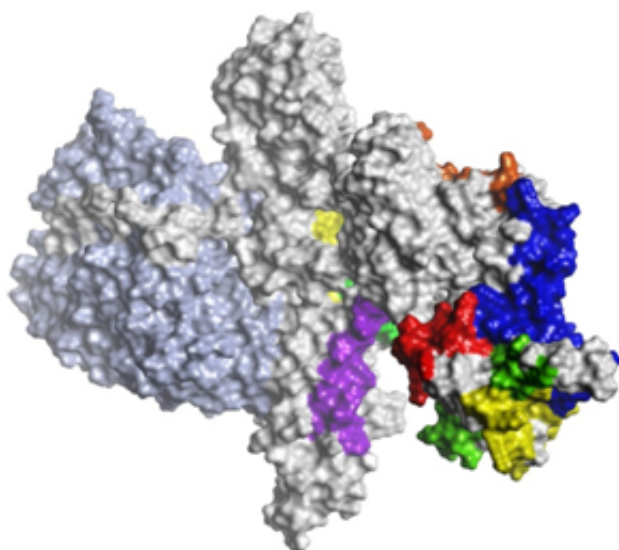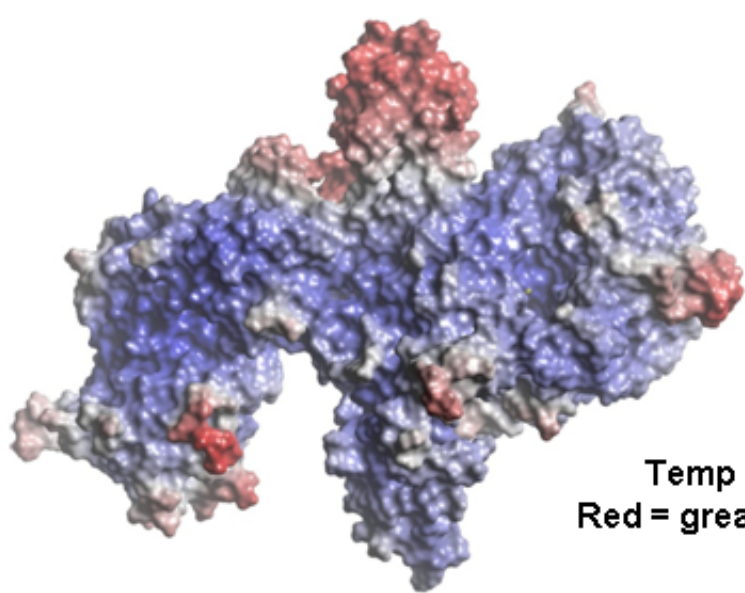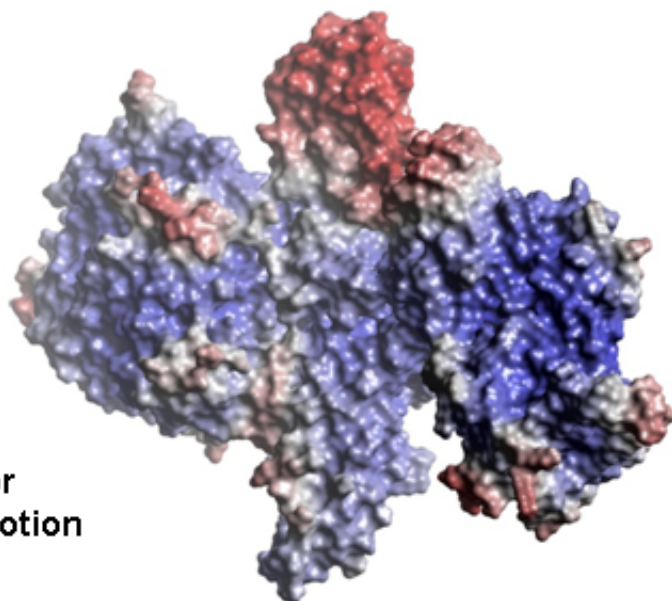

Temp Factor  
Red = greater motion

Supplement: Supplementary file 1 [file 4206688]
